# Supplementary material for: Hepatocyte Aquaporins AQP8 and AQP9 Are Engaged in the Hepatic Lipid and Glucose Metabolism Modulating the Inflammatory and Redox State in Milk-Supplemented Rats
Source: MDPI journal article supplement (doi:10.3390/nu15163651), 2023-08-20

**Table S1. Body weight gain in differently treated rats**

|                         | Control | CM        | DM      | HM      |
|-------------------------|---------|-----------|---------|---------|
| Initial body weight (g) | 327±3.0 | 354±4     | 362±3.9 | 340±4.7 |
| Final body weight (g)   | 469±2.5 | 529±4.8*  | 503±4   | 478±4.4 |
| Body weight gain (g)    | 142±2.5 | 175±2.25* | 141±1.3 | 138±0.9 |

p < 0.05 vs control, DM- and HM- fed rats

**Figure S1. Statistical analyses of Kupffer cells on sections derived from different areas at 40x magnification. Data are presented as means ± SEM. \*\*\*\* p < 0.0001.**

□ Control    ■ CM-treated    ▨ DM-treated    ▩ HM-treated

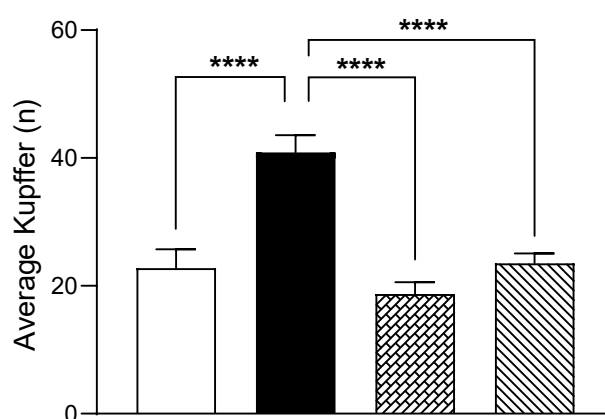

Supplement: s1 [file s1]
